# Supplementary material for: Synergistic Toughening of Epoxy Composite with Cellulose Nanofiber and Continuous Pineapple Leaf Fiber as Sustainable Reinforcements
Source: MDPI journal article supplement (doi:10.3390/nano13111703), 2023-05-23
Supplement: s1 [file s1]

# Synergistic Toughening of Epoxy Composite with Cellulose Nanofiber and Continuous Pineapple Leaf Fiber as Sustainable Reinforcements

Nichapa Klinthoophamrong <sup>1</sup>, Sombat Thanawan <sup>1,2</sup>, Gautier Schrodj <sup>3</sup>, Karine Mougin <sup>3</sup>, Kheng-Lim Goh <sup>4,5</sup> and Taweechai Amornsakchai <sup>1,6,\*</sup>

<sup>1</sup> Polymer Science and Technology Program, Department of Chemistry, Faculty of Science, Mahidol University, Phuttamonthon 4 Road, Salaya, Nakhon Pathom 73170, Thailand; sombat.tha@mahidol.ac.th (S.T.)

<sup>2</sup> Rubber Technology Research Center, Faculty of Science, Mahidol University, Phuttamonthon 4 Road, Salaya, Nakhon Pathom 73170, Thailand

<sup>3</sup> Institut de Science des Matériaux de Mulhouse, IS2M-CNRS-UHA, 15, Rue Jean Starcky, B.P.2488-68057 Mulhouse, Cedex, France; gautier.schrodj@uha.fr (G.S.); karine.mougin@uha.fr (K.M.)

<sup>4</sup> Mechanical Design and Manufacturing Engineering, Newcastle University in Singapore, 172A Ang Mo Kio Avenue 8 #05-01, SIT@NYP Building, Singapore 567739, Singapore; kheng-lim.goh@newcastle.ac.uk

<sup>5</sup> Faculty of Science, Agriculture & Engineering, Newcastle University, Newcastle upon Tyne NE1 7RU, UK

<sup>6</sup> Center of Sustainable Energy and Green Materials, Faculty of Science, Mahidol University, Phuttamonthon 4 Road, Salaya, Nakhon Pathom 73170, Thailand

\* Correspondence: taweechai.amo@mahidol.ac.th

### Preparation of CNF-epoxy composite (CNF-EP)

The preparation of CNF reinforced epoxy composite is shown in **Figure S1a**. Ultrasonic treatment was applied to facilitate CNF dispersion in acetone media, as show in **Figure S1b**. Moreover, we found that the addition of a higher amount of CNF seriously increased the viscosity of the epoxy resin, as showed in **Figure S1c**. Nanocomposite reinforced with CNF content higher than 1 wt.% caused difficulty in homogenous mixing. Consequently, unavoidable tiny voids were trapped inside the materials, and fiber aggregation occurred. The mechanical properties of the composite reinforced with a higher amount of CNF cloud be diminished.

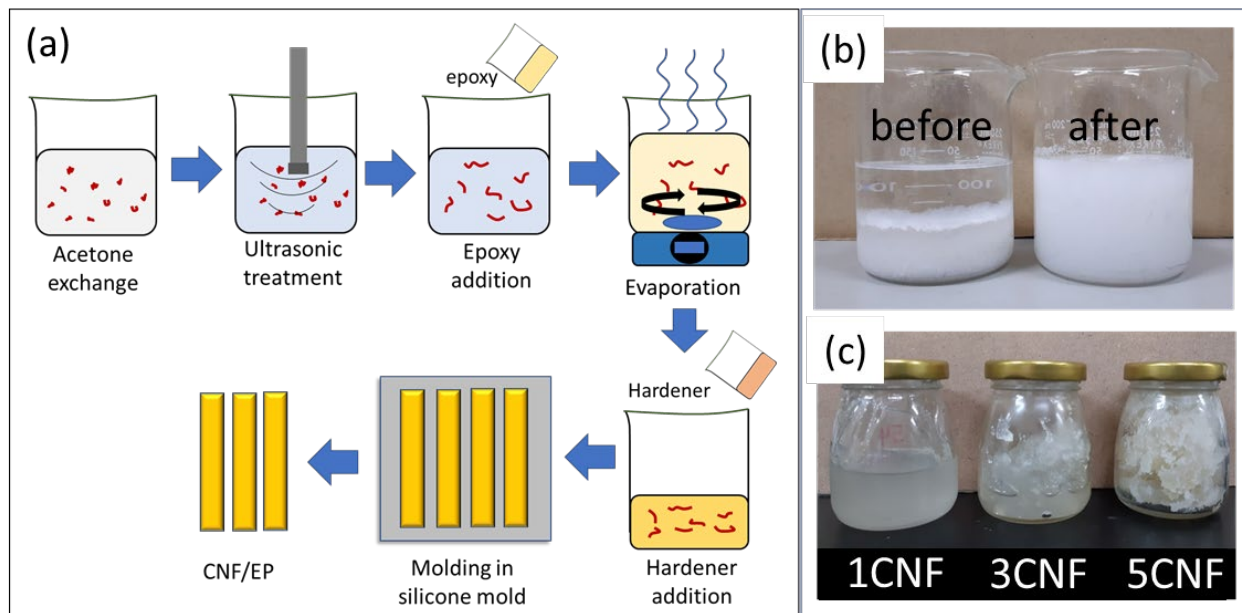

**Figure S1.** (a) Preparation of cellulose nanofiber reinforced epoxy composite (CNF/EP), (b) images of solution of CNF before and after ultrasonic treatment, (c) images of 1CNF, 3CNF, and 5CNF before hardening addition.

## Structural analysis of the matrix with DSC

**Figure S2** displays thermograms of epoxy filled with varying amounts of CNF. Some thermograms showed an obscure and unusual baseline change instead of a single, clear step change in the baseline. The glass transition temperature ( $T_g$ ) was determined by the intersection between the onset temperature and the transition point, and is represented in **Table 1** of the main paper.

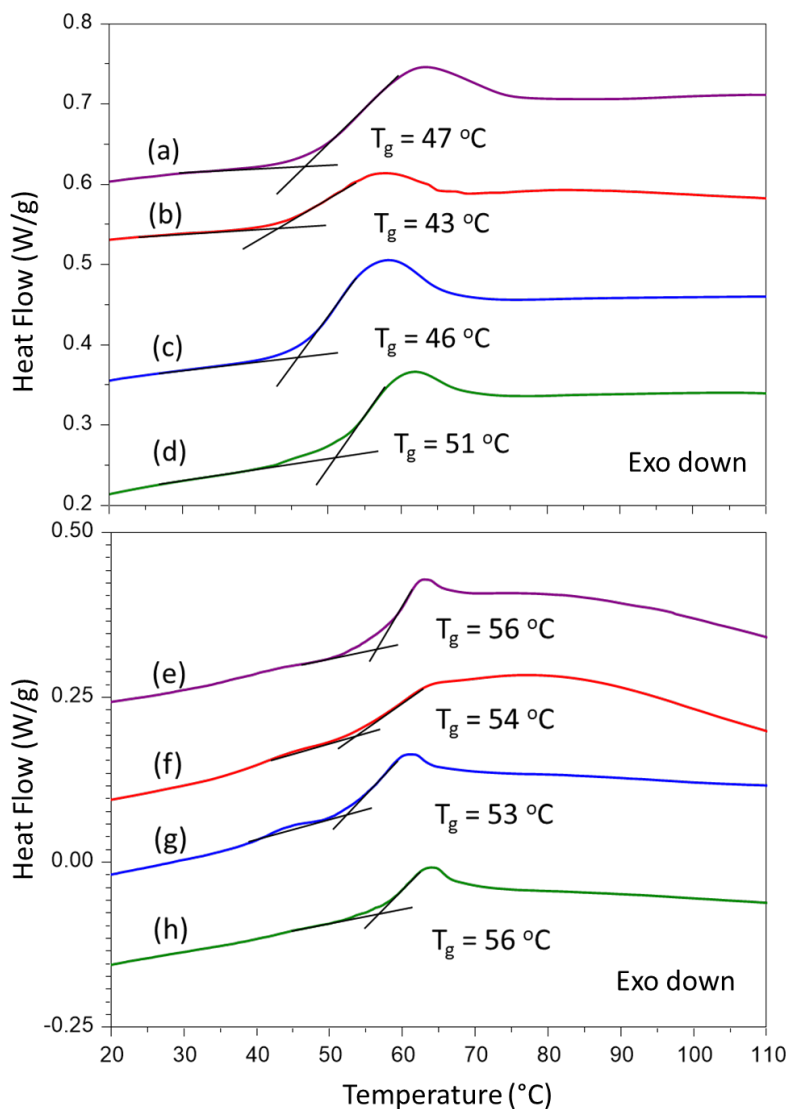

**Figure S2.** DSC curves of (a) 0CNF (b) 1CNF (c) 3CNF (d) 5CNF (e) 0CNF/PALF (f) 1CNF/PALF (g) 3CNF/PALF (h) 5CNF/PALF.

## Structural analysis of the matrix with DSC

The nanocomposites were characterized in double cantilever mode using a Viscoanalyzer (Metravib VA 4000, Limonest, France). The  $T_g$  (**Table S1**) was calculated from the maximum peak of the Tan delta thermogram, as shown in **Figure S3**. We also observed a slight drop in the  $T_g$  calculated from DMA analysis of 1CNF. Furthermore, the  $T_g$  of the overall nanocomposite did not show a significant difference compared to the previous results obtained from DSC measurement. However, the  $T_g$  resulting from the DMA analyzer was somewhat higher than those obtained from the DSC method [1].

**Table S1.** Glass transition temperature of nanocomposites

| Composite system | $T_g$ (°C) from DSC | $T_g$ (°C) from DMA |
|------------------|---------------------|---------------------|
| 0CNF             | 55                  | 69                  |
| 1CNF             | 49                  | 67                  |
| 3CNF             | 52                  | 69                  |
| 5CNF             | 55                  | 69                  |

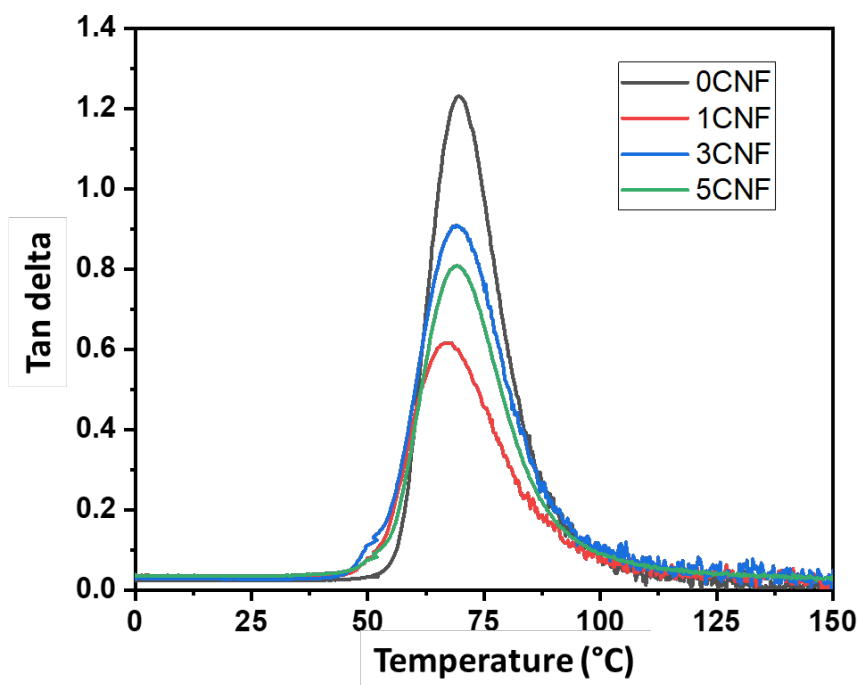

**Figure S3.** Tan delta of the nanocomposites resulted from DMA analysis.

## Reference

1 Souza, J.P.B.d.; Reis, J.M.L.d. A Thermomechanical and Adhesion Analysis of Epoxy/Al<sub>2</sub>O<sub>3</sub> Nanocomposites. *Nanomater. Nanotechnol.* **2015**, *5*, 1-7. DOI: 10.5772/60938.
